# Supplementary material for: Photophysical Properties of BADAN Revealed in the Study of GGBP Structural Transitions
Source: MDPI journal article supplement (doi:10.3390/ijms222011113), 2021-10-15
Supplement: s1 [file s1]

## Supplementary information

### Photophysical properties of BADAN revealed in the study of GGBP structural transitions

Alexander V. Fonin <sup>1,\*</sup>, Sergey A. Silonov <sup>1</sup>, Iuliia A. Antifeeva <sup>1</sup>, Olga V. Stepanenko <sup>1</sup>, Olesya V. Stepanenko <sup>1</sup>, Anna S. Fefilova <sup>1,2</sup>, Olga I. Povarova <sup>1</sup>, Olesya V. Stepanenko <sup>1</sup>, Anastasia A. Gavrilova <sup>1</sup>, Irina M. Kuznetsova <sup>1,\*</sup> and Konstantin K. Turoverov <sup>1,\*</sup>

<sup>1</sup> Laboratory of Structural Dynamics, Stability and Folding of Proteins, Institute of Cytology,

Russian Academy of Sciences, 4 Tikhoretsky Ave., 194064 St. Petersburg, Russia;

<sup>2</sup> Research Center for Molecular Mechanisms of Aging and Age-Related Diseases, Moscow Institute of Physics and Technology, 141700 Dolgoprudny, Russia

\* Correspondence: alexfonin@incras.ru (A.V.F.); imk@incras.ru (I.M.K.), kkt@incras.ru (K.K.T.);

**Table S1.** Fluorescent characteristics of free BADAN and BADAN linked to GGBP variants in GdnHCl and urea solutions

| <i>GGBP/H152C-BADAN apoform</i>  |      |      |           |      |           |      |           |              |                       |                 |
|----------------------------------|------|------|-----------|------|-----------|------|-----------|--------------|-----------------------|-----------------|
| [Denaturant]                     | < >  | 1,   | $S_1$ , % | 2,   | $S_2$ , % | 3,   | $S_3$ , % | <sup>2</sup> | $\lambda_{\max}$ , nm | $r^{387}_{530}$ |
|                                  | ns   | ns   |           | ns   |           | ns   |           |              |                       |                 |
| 0 M                              | 1.35 | 3.59 | 14.88     | 1.13 | 66.68     | 0.32 | 18.43     | 0.99         | 540                   | 0.19            |
| 0.5 M GdnHCl                     | 2.70 | 3.83 | 50.12     | 1.84 | 39.83     | 0.54 | 10.05     | 0.99         | 515                   | 0.17            |
| 1.2 M Urea                       | 2.39 | 3.84 | 40.48     | 1.68 | 46.01     | 0.48 | 13.51     | 0.99         | 515                   | 0.17            |
| 3 M GdnHCl                       | 1.41 | 2.44 | 32.57     | 1.07 | 52.54     | 0.35 | 14.88     | 0.94         | 541                   | 0.14            |
| 4 M Urea                         | 1.63 | 2.96 | 28.98     | 1.29 | 55.61     | 0.4  | 15.41     | 1.04         | 538                   | 0.14            |
| 5.5 M GdnHCl                     | 1.36 | 2.56 | 24.09     | 1.17 | 57.23     | 0.4  | 18.67     | 0.92         | 543                   | 0.14            |
| 6 M Urea                         | 1.55 | 2.57 | 36.36     | 1.12 | 52.01     | 0.35 | 11.63     | 0.99         | 540                   | 0.14            |
| <i>GGBP/H152C-BADAN holoform</i> |      |      |           |      |           |      |           |              |                       |                 |
| [Denaturant]                     | < >  | 1,   | $S_1$ , % | 2,   | $S_2$ , % | 3,   | $S_3$ , % | <sup>2</sup> | $\lambda_{\max}$ , nm | $r^{387}_{530}$ |
|                                  | ns   | ns   |           | ns   |           | ns   |           |              |                       |                 |
| 0 M                              | 3.09 | 3.39 | 85.76     | 1.33 | 14.24     |      |           | 1.10         | 535                   | 0.26            |
| 1.5 M GdnHCl                     | 1.80 | 2.67 | 52.8      | 0.85 | 47.2      |      |           | 1.09         | 530                   | 0.20            |
| 2 M Urea                         | 2.80 | 3.70 | 55.34     | 2.0  | 38.18     | 0.52 | 6.48      | 1.07         | 531                   | 0.20            |
| 3 M GdnHCl                       | 1.45 | 2.37 | 39.1      | 0.96 | 52.08     | 0.26 | 8.83      | 1.01         | 541                   | 0.14            |
| 4 M Urea                         | 1.65 | 2.90 | 31.14     | 1.29 | 51.81     | 0.43 | 17.05     | 1.05         | 538                   | 0.14            |
| 5.5 M GdnHCl                     | 1.39 | 2.27 | 38.57     | 0.94 | 52.31     | 0.27 | 9.13      | 1.00         | 543                   | 0.14            |
| 6 M Urea                         | 1.54 | 2.25 | 43.02     | 1.16 | 46.9      | 0.31 | 10.08     | 1.05         | 540                   | 0.14            |
| <i>GGBP/W284C-BADAN apoform</i>  |      |      |           |      |           |      |           |              |                       |                 |
| [Denaturant]                     | < >  | 1,   | $S_1$ , % | 2,   | $S_2$ , % | 3,   | $S_3$ , % | <sup>2</sup> | $\lambda_{\max}$ , nm | $r^{387}_{530}$ |
|                                  | ns   | ns   |           | ns   |           | ns   |           |              |                       |                 |
| 0 M                              | 2.39 | 5.59 | 17.94     | 1.99 | 65.84     | 0.42 | 16.21     | 1.03         | 521                   | 0.18            |
| 5.5 M GdnHCl                     | 2.01 | 4.73 | 13.98     | 1.75 | 73.67     | 0.47 | 12.35     | 0.97         | 544                   | 0.14            |
| 6 M Urea                         | 1.99 | 4.01 | 15.05     | 2.01 | 65.21     | 0.43 | 19.74     | 1.09         | 538                   | 0.14            |
| <i>free BADAN</i>                |      |      |           |      |           |      |           |              |                       |                 |
| [Denaturant]                     | < >  | 1,   | $S_1$ , % | 2,   | $S_2$ , % | 3,   | $S_3$ , % | <sup>2</sup> | $\lambda_{\max}$ , nm | $r^{387}_{530}$ |
|                                  | ns   | ns   |           | ns   |           | ns   |           |              |                       |                 |
| 0 M                              | 0.92 | 2.34 | 16.84     | 0.85 | 57.12     | 0.19 | 26.04     | 0.99         | 530                   | 0.05            |
| 8 M GdnHCl                       | 1.43 | 3.65 | 19.10     | 1.20 | 56.62     | 0.23 | 24.28     | 0.97         | 519                   | 0.07            |
| 8 M urea                         | 1.37 | 2.21 | 41.98     | 1.01 | 28.30     | 0.53 | 29.72     | 0.99         | 525                   | 0.07            |

**Table S2.** The anisotropy time-resolved characteristics of BADAN linked to GGBP/H152C.

| <i>GGBP/H152C-BADAN apoform</i>  |            |            |       |          |            |            |
|----------------------------------|------------|------------|-------|----------|------------|------------|
| [Denaturant]                     | $r_{fast}$ | $r_{slow}$ | $r_0$ | , deg.*  | $r_{fast}$ | $r_{slow}$ |
|                                  |            |            |       |          | ns         | ns         |
| 0 M                              | 0.08       | 0.16       | 0.24  | 29       | 0.3        | 34         |
| 0.5 M                            | 0.14       | 0.14       | 0.28  | 38       | 0.3        | 30         |
| GdnHCl                           |            |            |       |          |            |            |
| 1.2 M Urea                       | 0.10       | 0.13       | 0.23  | 34       | 0.3        | 28         |
| 3 M GdnHCl                       | 0.07       | 0.07       | 0.14  | 39       | 0.3        | 5.6        |
| 4 M Urea                         | 0.07       | 0.07       | 0.14  | 38       | 0.3        | 5.8        |
| 5.5 M                            | 0.07       | 0.08       | 0.15  | 36       | 0.4        | 4.2        |
| GdnHCl                           |            |            |       |          |            |            |
| 6 M Urea                         | 0.07       | 0.08       | 0.15  | 36       | 0.3        | 4.5        |
| <i>GGBP/H152C-BADAN holoform</i> |            |            |       |          |            |            |
| [Denaturant]                     | $r_{fast}$ | $r_{slow}$ | $r_0$ | , degree | $r_{fast}$ | $r_{slow}$ |
|                                  |            |            |       |          | ns         | ns         |
| 0 M                              | 0.07       | 0.19       | 0.26  | 25       | 0.3        | 31         |
| 1.5 M                            | 0.09       | 0.14       | 0.23  | 31       | 0.3        | 30         |
| GdnHCl                           |            |            |       |          |            |            |
| 2 M Urea                         | 0.08       | 0.16       | 0.24  | 28       | 0.3        | 28         |
| 3 M GdnHCl                       | 0.06       | 0.13       | 0.19  | 36       | 0.3        | 4.2        |
| 4 M Urea                         | 0.07       | 0.08       | 0.15  | 37       | 0.3        | 5.3        |
| 5.5 M                            | 0.08       | 0.10       | 0.18  | 34       | 0.3        | 4.6        |
| GdnHCl                           |            |            |       |          |            |            |
| 6 M Urea                         | 0.07       | 0.10       | 0.17  | 33       | 0.3        | 5          |

\* The mean amplitude of dye motions was calculated according eq.5.

## Methods

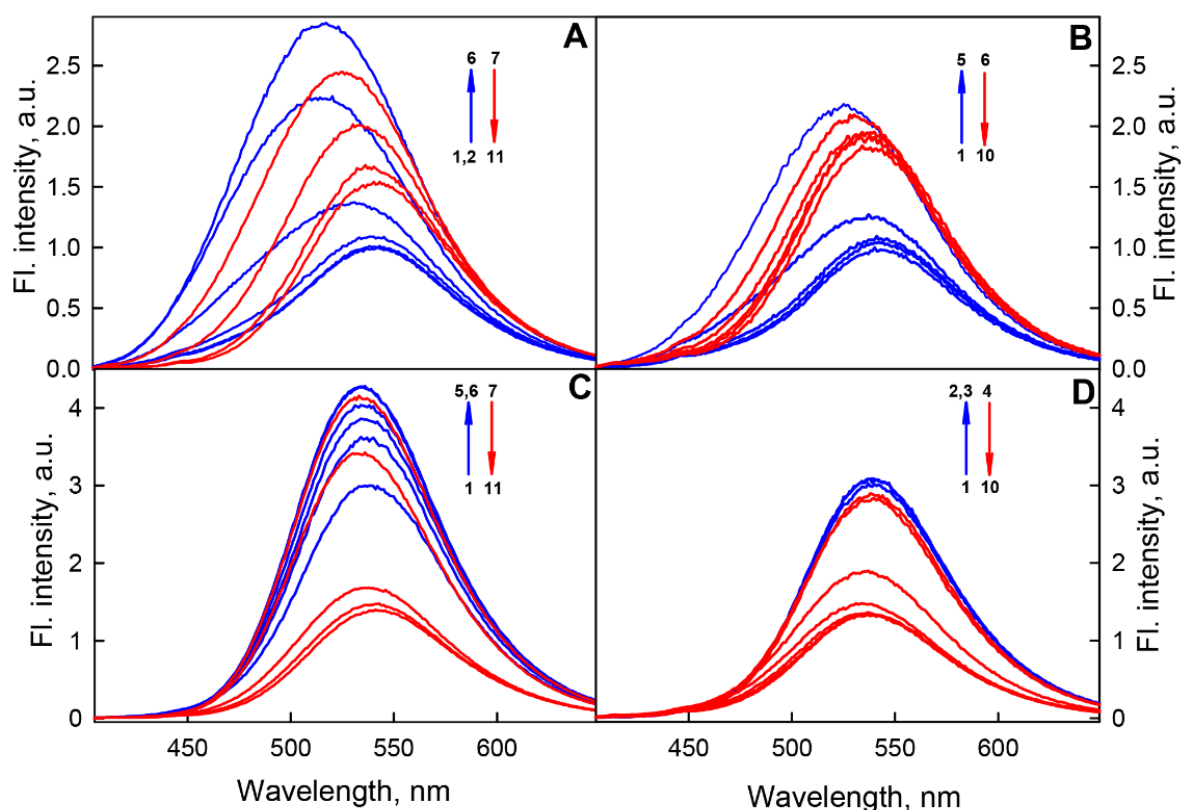

**Figure S1.** GdnHCl-induced (panels A, C) and urea-induced (panels B, D) changing of fluorescent characteristics of BADAN linked to GGBP/H152C in apo (panels A, B) and holoform (panels C, D). The GGBP/H152C–BADAN spectra with increasing fluorescence intensity are represented by blue curves, with decreasing fluorescence intensity were represent by red curves. The spectra of GGBP/H152C-BADAN apoform (panel A) in the presence of 0, 0.1, 0.2, 0.3, 0.4, 0.6, 0.8, 1.2, 2.3 and 3 M GdnHCl are represented by 1 – 10 curves, respectively. The spectra of GGBP/H152C-BADAN holoform (panel C) in the presence of 0, 0.1, 0.2, 0.4, 0.6, 0.8, 1.0, 1.3, 1.8, 2.5, and 3.3 M GdnHCl are represented by 1 – 11 curves, respectively. The spectra of GGBP/H152C-BADAN apo and holoform (panels B and D) in the presence of 0, 0.1, 0.5, 1.0, 1.5, 2.0, 2.5, 3.0, 3.5 and 4.0 M urea solutions are represented by 1 – 10 curves, respectively. To form protein-ligand complex 20 mM glucose was added in solutions. The excitation wavelength was 387 nm.

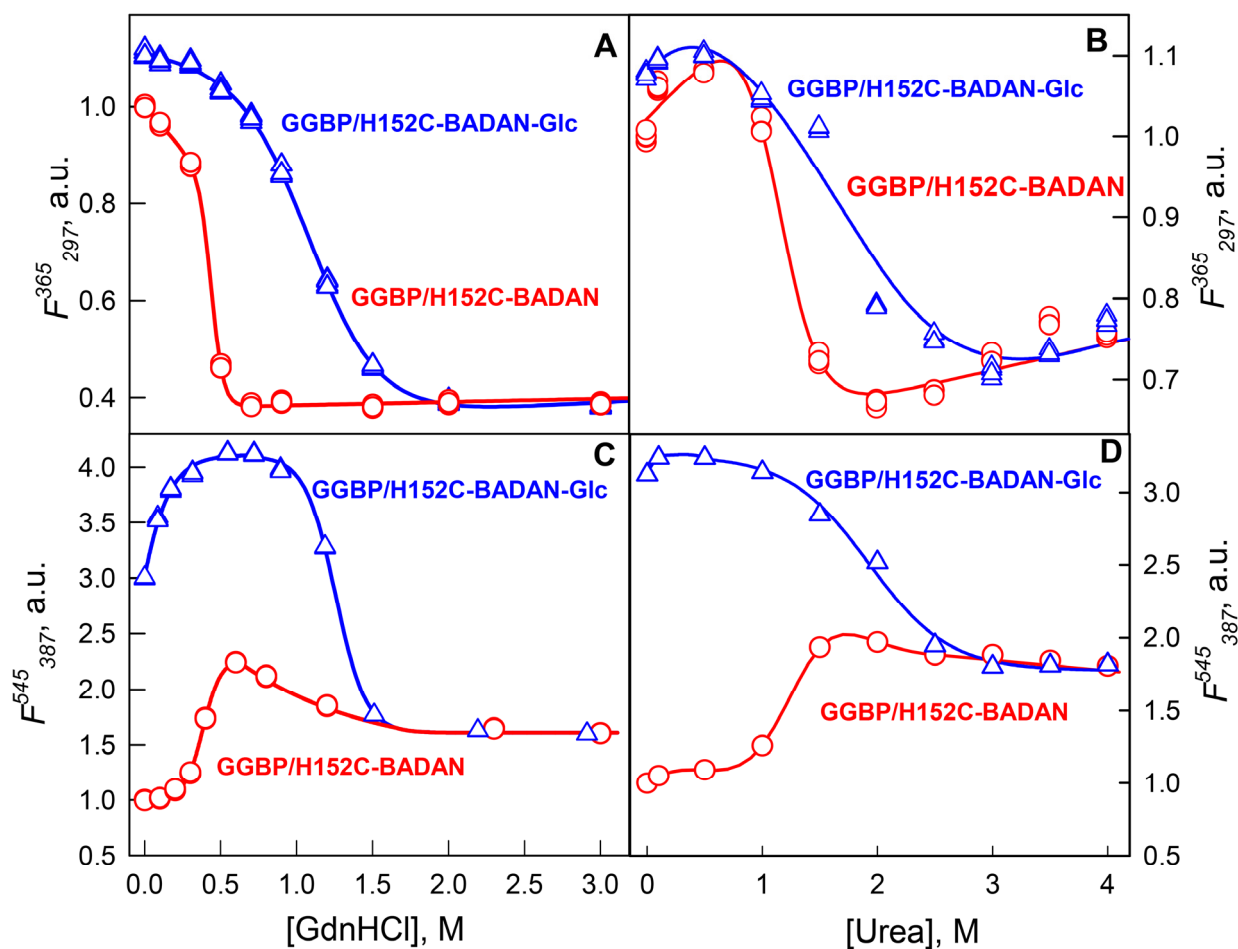

**Figure S2.** GdnHCl-induced (Panel A, C) and urea-induced (Panel B, D) conformational changing of GGBP/H152C-BADAN structure in apo (red curves and circles) and holoforms (blue curves and triangles). Panel A and B represent the dependence of the  $F_{365, 297}$  (fluorescence intensities recorded 365 nm at excitation wavelength 297 nm on the denaturants concentration. Panel C and D represent the dependence of the fluorescence intensities recorded 587 nm at excitation wavelength 387 nm on the denaturants concentration.

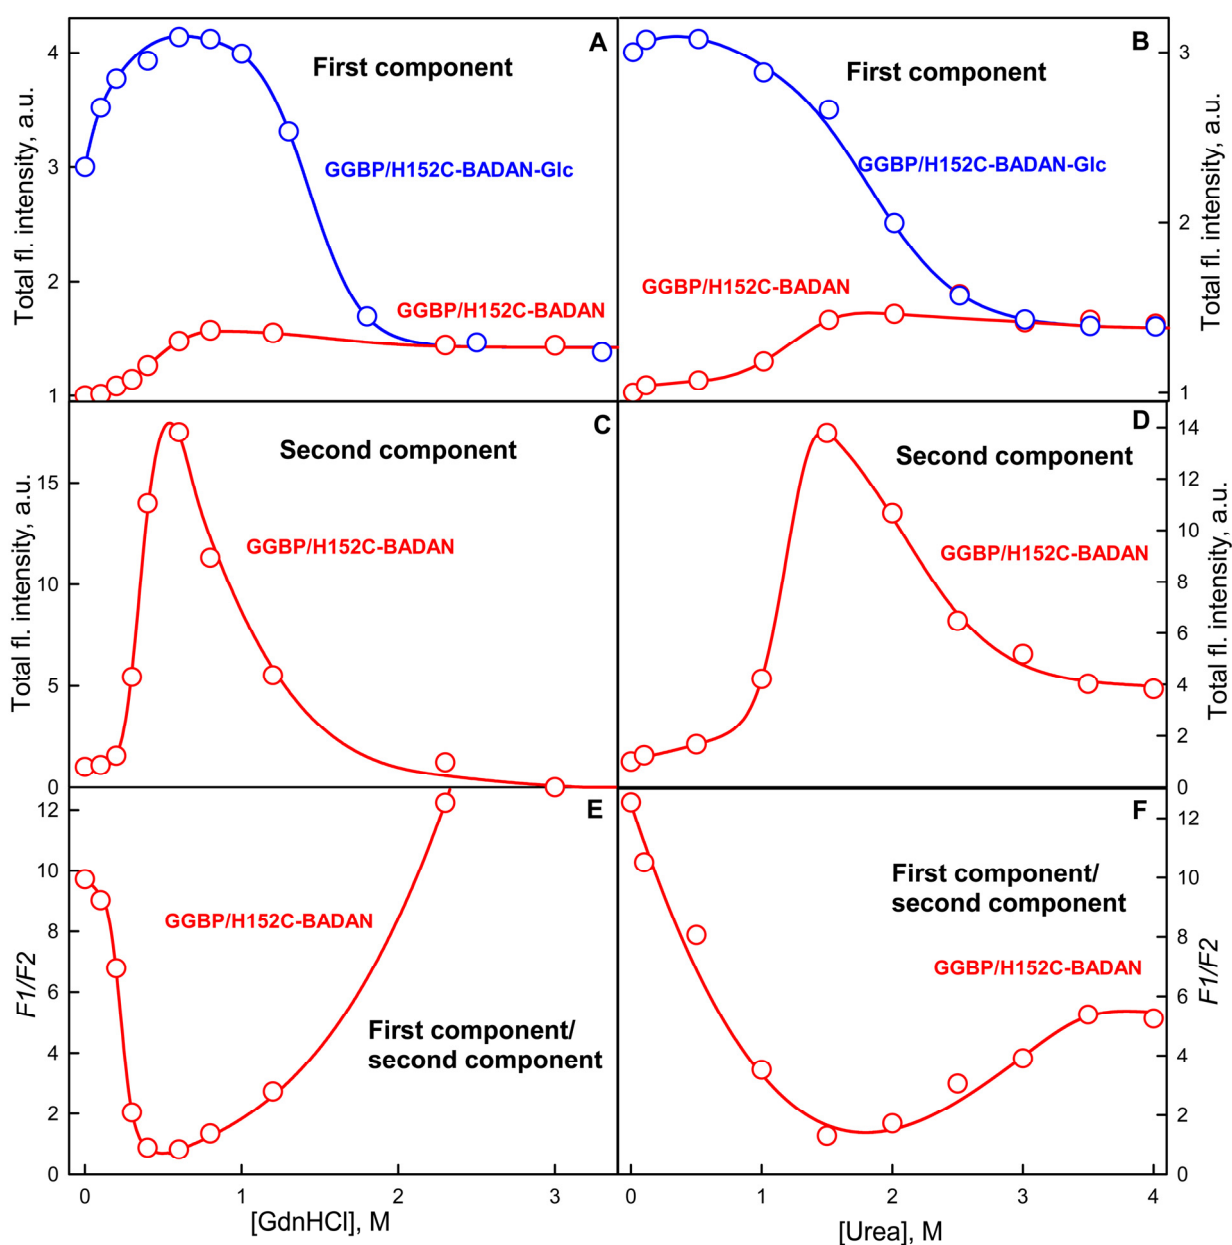

**Figure S3.** The dependence of fluorescent characteristics of BADAN linked to GGBP/H152C in apo (red curves) and holoforms (blue curves) on GdnHCl (panels A, C, E) and urea (panels B, D, F) concentration. The total fluorescence intensity of long-wave BADAN component represented in Panels A, B. The total fluorescence intensity of short-wave BADAN component represented in Panels C, D. The ratio of the total intensity of long-wave BADAN component to the total intensity of short-wave BADAN component was represented in Panels E, F. The excitation wavelength was 387 nm.

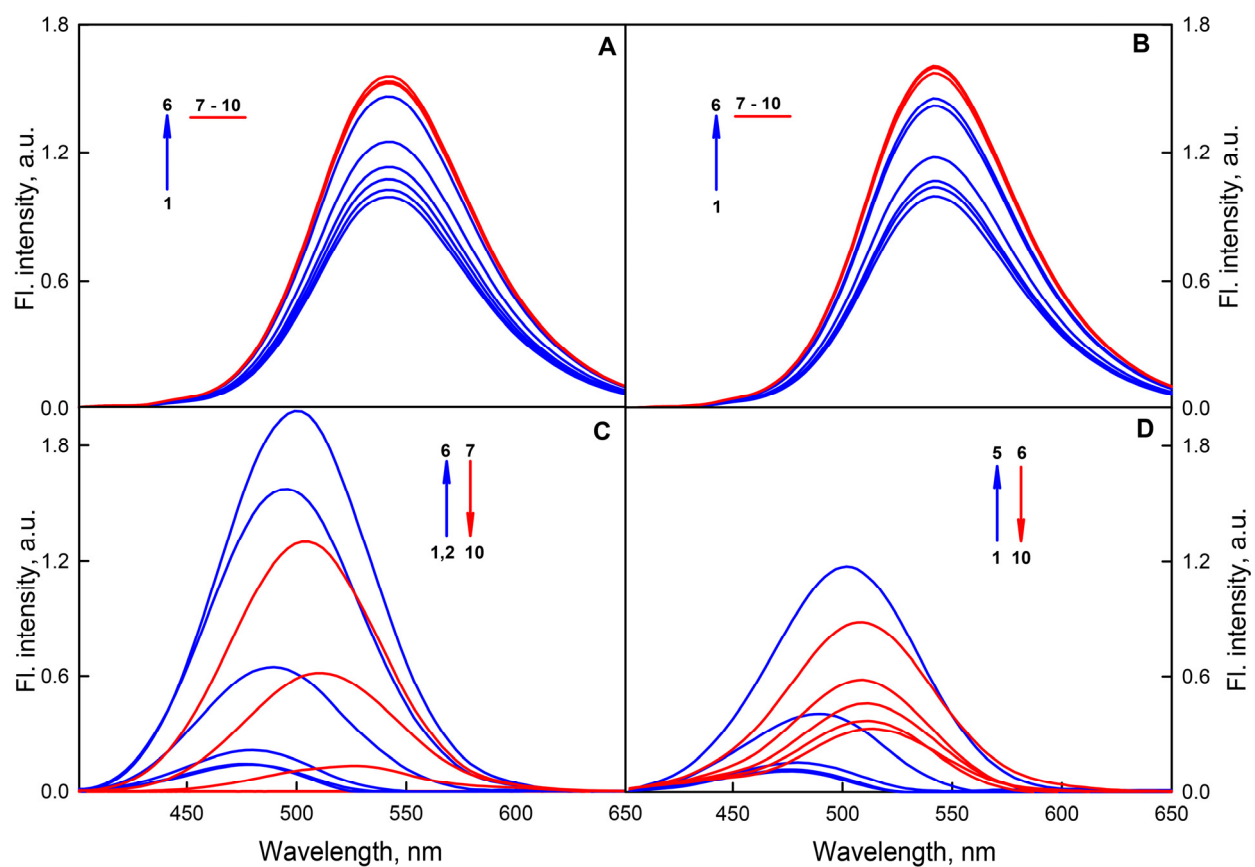

**Figure S4.** The spectra of long-wave (panels **A**, **B**) and short-wave (panels **C**, **D**) of fluorescence of BADAN linked to GGBP/H152C in GdnHCl (panels **A**, **C**) and urea (panels **B**, **D**). The colors and legends of curves are the same as in Figure 7. The excitation wavelength was 387 nm.

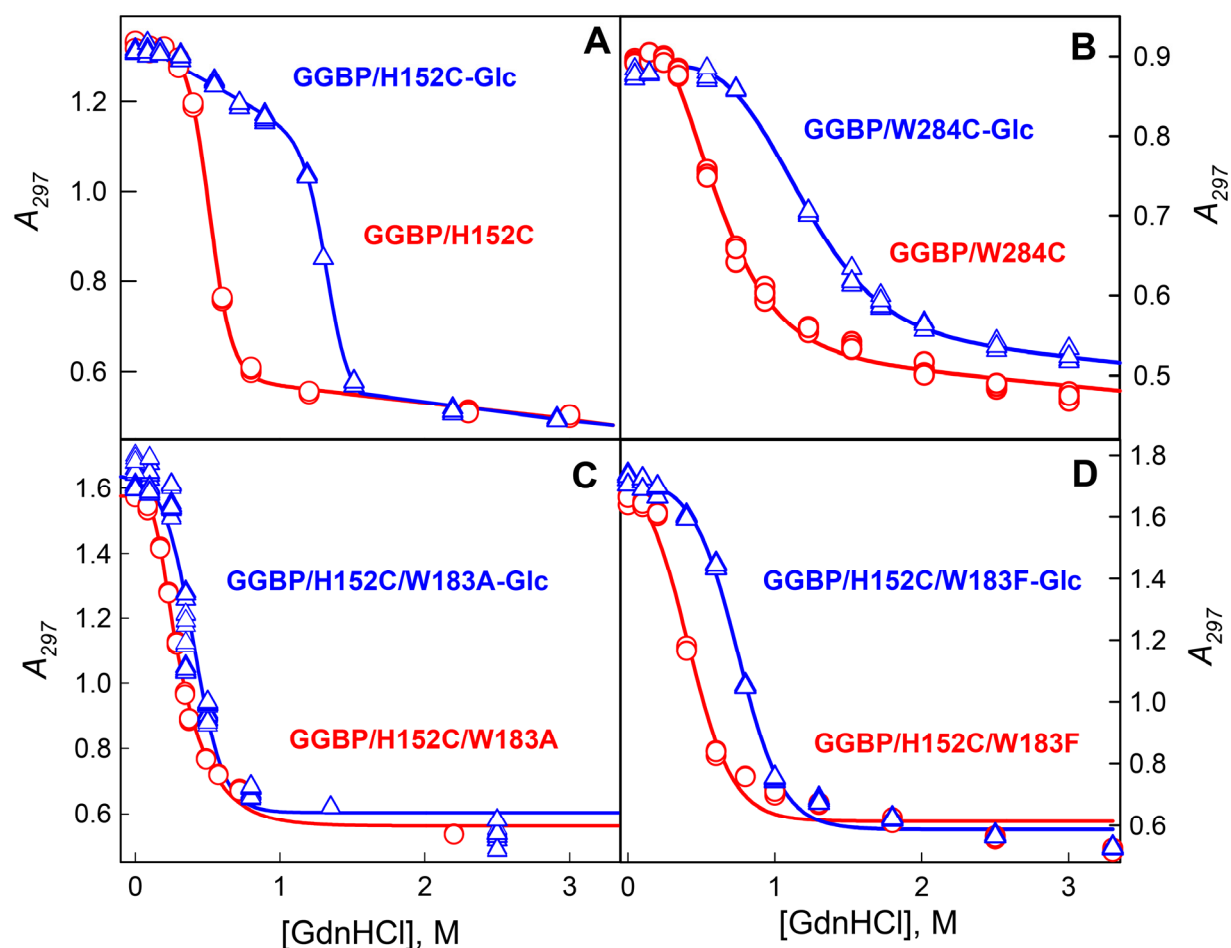

**Figure S5.** GdnHCl-induced conformational changing of GGBP mutant forms in apo (red curves and circles) and holoforms (blue curves and triangles) according to UV fluorescence data. The dependence of the parameter  $A = F_{320_{297}}/F_{365_{297}}$  ( $F_{20_{297}}$  and  $F_{365_{297}}$  are fluorescence intensities recorded at 320 and 365 nm at excitation wavelength 297 nm, respectively) on the GdnHCl concentration for GGBP/H152C, GGBP/W284C, GGBP/H152C/W183A, GGBP/H152C/W183F are represented on panels A, B, C, D, respectively.
